# Supplementary material
Source: MDPI journal article supplement (https://www.mdpi.com/2073-4344/13/4/699)
Supplement: s1 [file s1 › catalysts-2289981-supplementary.pdf]

# Crystal-Plane-Dependent Guaiacol Hydrodeoxygenation Performance of Au on Anatase TiO<sub>2</sub>

Bin Zhao <sup>1</sup>, Xiaoqiang Zhang <sup>2</sup>, Jingbo Mao <sup>3</sup>, Yanli Wang <sup>1</sup>, Guanghui Zhang <sup>1</sup>, Zongchao Conrad Zhang <sup>2,\*</sup> and Xinwen Guo <sup>1,\*</sup>

<sup>1</sup> State Key Laboratory of Fine Chemicals, Frontier Science Center for Smart Materials, PSU-DUT Joint Center for Energy Research, School of Chemical Engineering, Dalian University of Technology, Dalian 116024, China

<sup>2</sup> State Key Laboratory of Catalysis, Dalian National Laboratory for Clean Energy, Dalian Institute of Chemical Physics, Chinese Academy of Sciences, Dalian 116023, China

<sup>3</sup> College of Environmental and Chemical Engineering, Dalian University, Dalian 116622, China

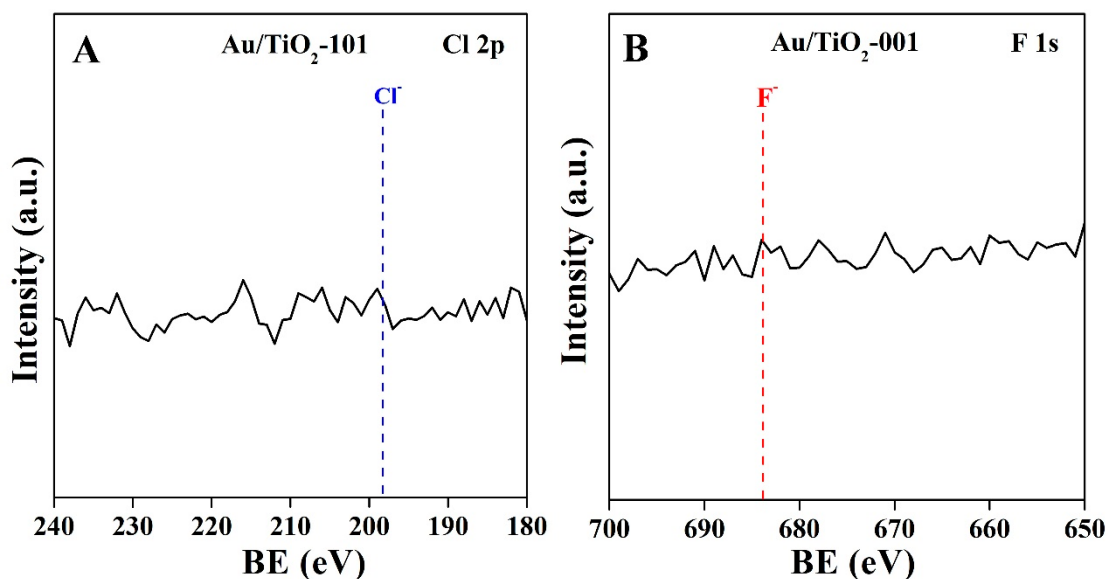

Figure S1. XPS spectrum of Cl 2p and F 1s in the Au/TiO<sub>2</sub>-101(A) and Au/TiO<sub>2</sub>-001(B)

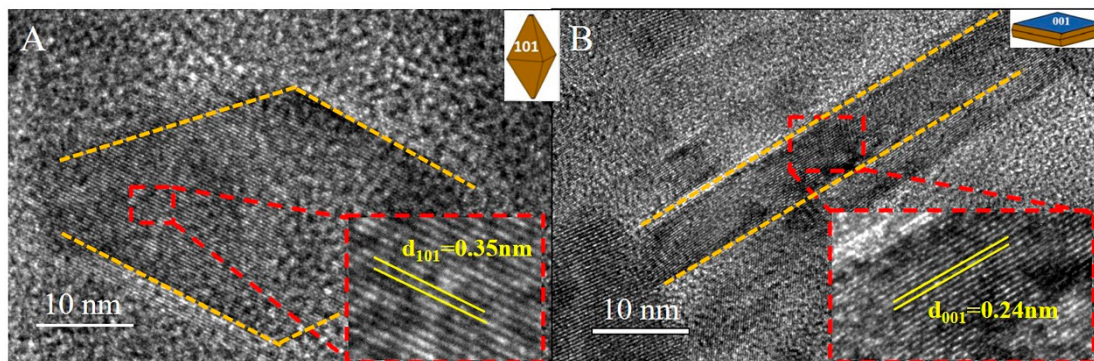

Figure S2. HRTEM images of TiO<sub>2</sub>-101(A), TiO<sub>2</sub>-001(B)

**Table S1.** The percentages of different crystal planes in the as-prepared TiO<sub>2</sub> nanocrystals were based on geometric calculation.

| Samples               | 101    | 001    |
|-----------------------|--------|--------|
| TiO <sub>2</sub> -101 | 95.9 % | 4.1 %  |
| TiO <sub>2</sub> -001 | 15.8 % | 84.2 % |

Based on the statistical analysis of TEM and HRTEM images of TiO<sub>2</sub>-101 and TiO<sub>2</sub>-001 and assuming the ideal crystal models expected from the Wulff Construction, we calculated the percentages of different facet orientations for the different types of TiO<sub>2</sub> nanocrystals.

(1). TiO<sub>2</sub>-101 nanocrystals

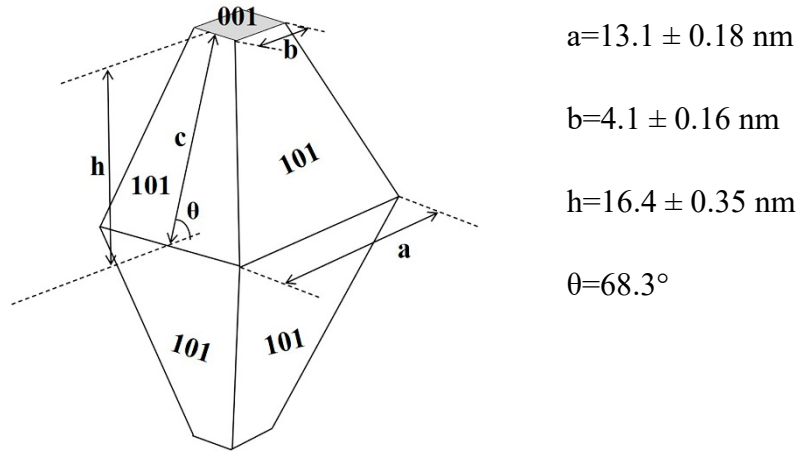

**Figure S3.** Geometric model of TiO<sub>2</sub>-101 nanocrystals.

There are two kinds of crystal planes exposed in TiO<sub>2</sub>-101 sample: 101 and 001. We can figure out the percentages of 101 and 100 in TiO<sub>2</sub>-101 nanocrystals as follows:

$$c = \frac{h}{\sin \theta}$$

$$S_{101} = \frac{1}{2}(a + b)c$$

$$S_{001} = b^2$$

$$P_{101} = \frac{S_{101} \times 8}{S_{101} \times 8 + S_{001} \times 2}$$

$$P_{001} = \frac{S_{001} \times 2}{S_{101} \times 8 + S_{001} \times 2}$$

(2). TiO<sub>2</sub>-001 nanocrystals

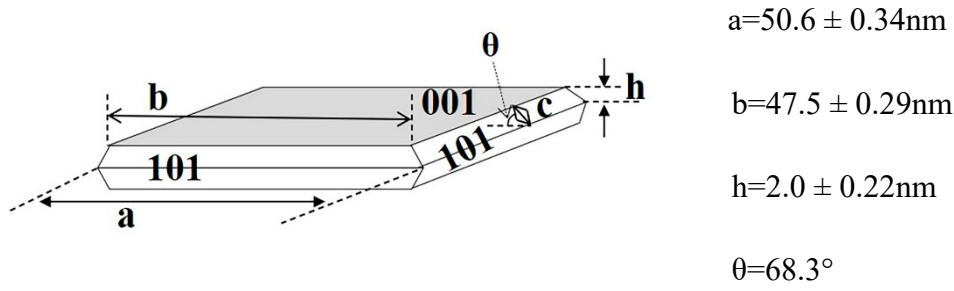

**Figure S4.** Geometric model of TiO<sub>2</sub>-001 nanocrystals.

There are two kinds of crystal planes exposed in TiO<sub>2</sub>-001 sample: 101 and 001. We can figure out the percentages of 101 and 100 in TiO<sub>2</sub>-001 nanocrystals as follows:

$$c = \frac{h}{\sin \theta}$$

$$S_{101} = \frac{1}{2}(a + b)c$$

$$S_{001} = b^2$$

$$P_{101} = \frac{S_{101} \times 8}{S_{101} \times 8 + S_{001} \times 2}$$

$$P_{001} = \frac{S_{001} \times 2}{S_{101} \times 8 + S_{001} \times 2}$$

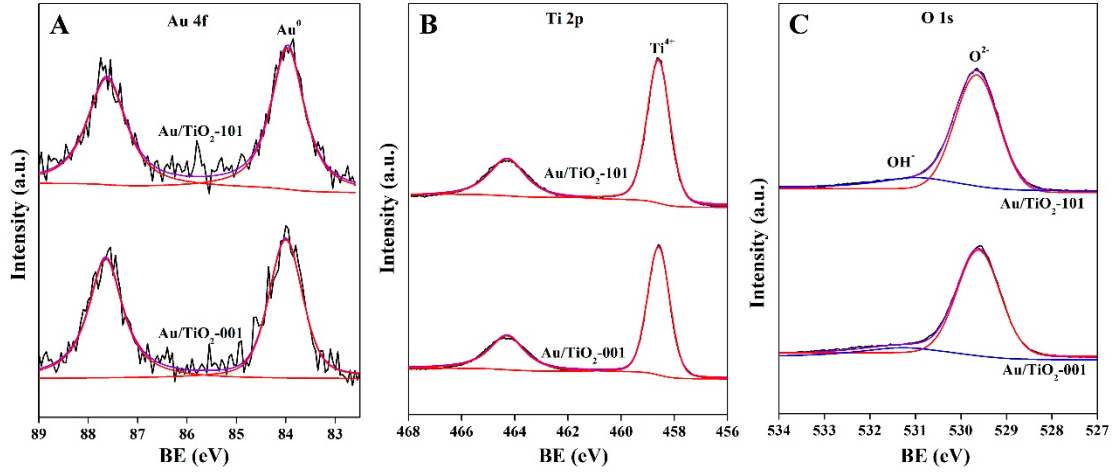

**Figure S5.** XPS spectrum of Au 4f (A), Ti 2p (B) and O 1s (C) in Au/TiO<sub>2</sub> catalysts before *in-situ* reduction

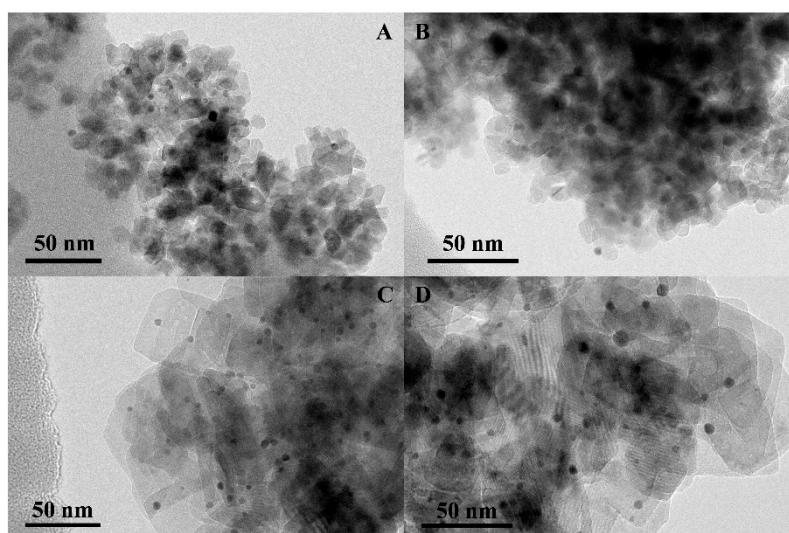

**Figure S6.** TEM images of Au/TiO<sub>2</sub> catalyst before and after pre-treatment. Au/TiO<sub>2</sub>-101-before (A), Au/TiO<sub>2</sub>-101-after (B), Au/TiO<sub>2</sub>-001-before (C) and Au/TiO<sub>2</sub>-001-after (D)
